# Supplementary material for: An inducible krasV12 transgenic zebrafish model for liver tumorigenesis and chemical drug screening
Source: PubMed Central journal article supplement — Dis Model Mech. 2011 Sep 8;5(1):63–72. doi: 10.1242/dmm.008367 (PMC3255544; doi:10.1242/dmm.008367), 2011-09-08
Supplement: supp_008367_DMM008367FigS1.pdf [file supp_008367_DMM008367FigS1.pdf]

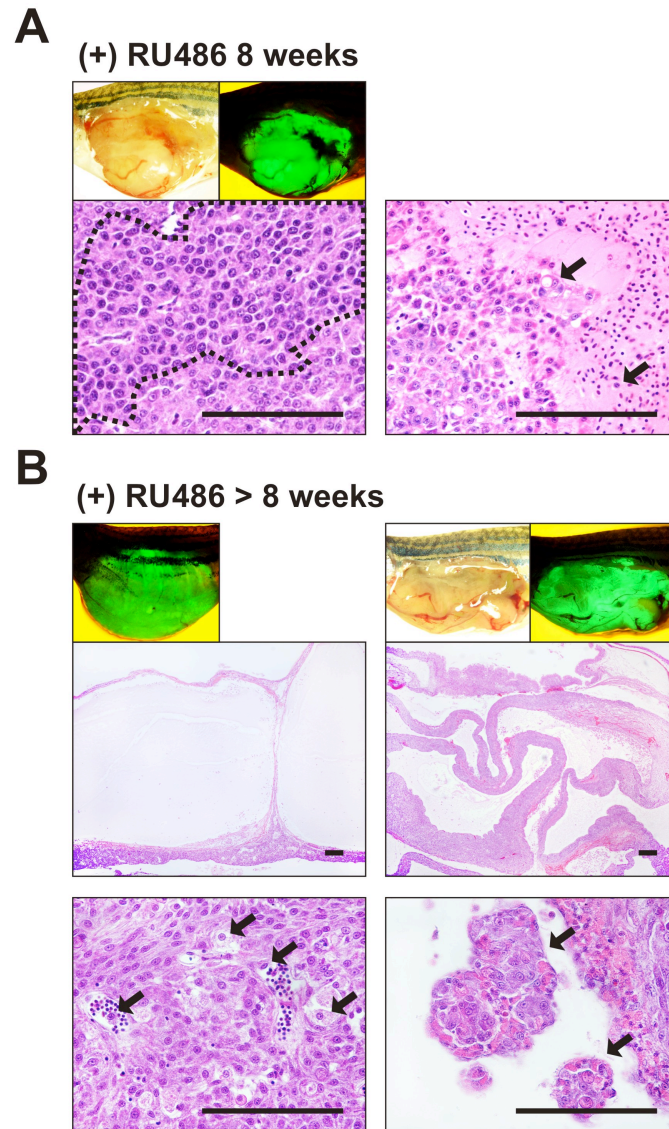

**Figure S1: Advanced liver tumors in induced *kras*<sup>V12</sup> double transgenic fish.** Morphological and histological examinations of liver tumors were carried out in driver-effector fish induced with mifepristone (RU486) for 8 weeks or longer. Representative brightfield and fluorescent images of liver morphology and histology of induced Driver-effector fish are shown. (A) One sample from 8 weeks of RU486 treatment. Histopathological analysis revealed that hepatoblastoma (dotted area) which is made up of undifferentiated cells with large nuclei developed in mixed carcinoma in Driver-effector fish after 8 weeks of induction. In addition, these fish also showed invasion of tumor cells into blood vessels. (B) Examples from more than 8 weeks of mifepristone induction. 10% of induced driver-effector fish developed cyst fluid or malignant ascites in HCC. Detached HCC cells were found in the cysts and blood vessels. Black arrows indicated invasive tumor cells. Scale bars, 100  $\mu$ m.
