# Supplementary material for: An inducible krasV12 transgenic zebrafish model for liver tumorigenesis and chemical drug screening
Source: PubMed Central journal article supplement — Dis Model Mech. 2011 Sep 8;5(1):63–72. doi: 10.1242/dmm.008367 (PMC3255544; doi:10.1242/dmm.008367), 2011-09-08
Supplement: supp_008367_DMM008367FigS2.pdf [file supp_008367_DMM008367FigS2.pdf]

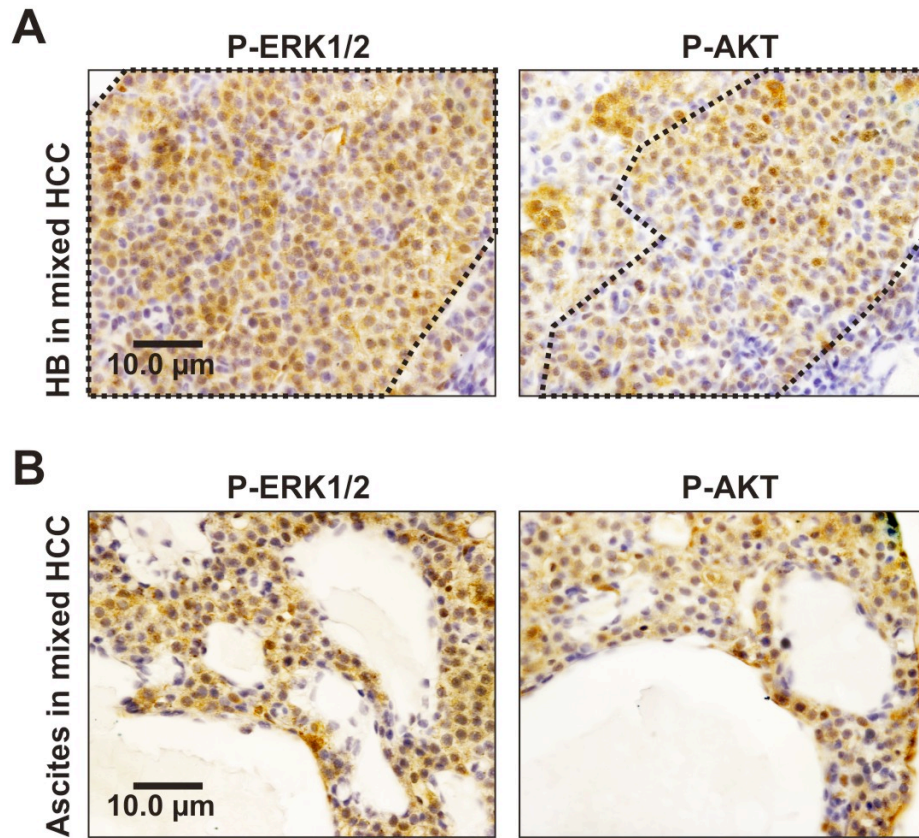

**Figure S2: Activation of both ERK and AKT pathways in advanced liver cancer of *kras*<sup>V12</sup> transgenic fish.** Driver-effector fish induced with mifepristone (RU486) for more than 8 weeks developed hepatoblastoma (HB) and ascites in mixed HCC. (A) Immunohistochemistry for P-ERK1/2 and P-AKT showing positive nuclear and cytoplasmic staining of both P-ERK1/2 and P-AKT proteins in HB (dotted area). (B) Ascites and cyst fluid in mixed HCC also displaying strong expression of P-ERK1/2 and P-AKT protein.
